# Supplementary material for: A Maximum Flow-Based Approach to Prioritize Drugs for Drug Repurposing of Chronic Diseases
Source: MDPI journal article supplement (doi:10.3390/life11111115), 2021-10-20
Supplement: s1 [file s1]

# Supplementary Information

## A maximum flow-based approach to prioritize drugs for drug repurposing of chronic diseases

In this supplementary, we presented the prediction performance of our proposed framework for the top 10 prioritized repurposed drugs for breast cancer (Table S1), Inflammatory bowel disease, i.e., IBD (Table S2) and Chronic Obstructive Pulmonary Disease, i.e., COPD (Table S3).

Table S1: The top 10 prioritized repurposed drugs for breast cancer.

| Drug Name                                                                                      | Target protein | Target gene | Flow value | Status    | Reference |
|------------------------------------------------------------------------------------------------|----------------|-------------|------------|-----------|-----------|
| Guanidine                                                                                      | P78352         | DLG4        | 0.0489     | Confirmed | 1         |
| Phenethyl Isothiocyanate                                                                       | P31946         | YWHAB       | 0.0389     | Confirmed | 2         |
| Caffeine                                                                                       | P78527         | PRKDC       | 0.0363     | Confirmed | 3         |
| Tamoxifen                                                                                      | Q05655         | PRKCD       | 0.0363     | Confirmed | 4         |
| (2S)-2-({6-[(3-Amino-5-chlorophenyl)amino]-9-isopropyl-9H-purin-2-yl}amino)-3-methyl-1-butanol | Q00534         | CDK6        | 0.03319202 |           |           |
| Epinephrine                                                                                    | P00441         | SOD1        | 0.03128153 |           |           |
| Purvalanol                                                                                     | P11802         | CDK4        | 0.03128055 | Confirmed | 5         |
| L-Lysine                                                                                       | Q15046         | KARS        | 0.02918842 | Confirmed | 6         |
| Phosphoaminophosphonic Acid-Adenylate Ester                                                    | P08069         | IGF1R       | 0.02522087 | Confirmed | 7         |
| Minocycline                                                                                    | P42574         | CASP3       | 0.02489913 | Confirmed | 8         |

Table S2: The top 10 prioritized repurposed drugs for the IBD.

| Drug Name                | Target protein | Target gene | Flow value | Status    | Reference |
|--------------------------|----------------|-------------|------------|-----------|-----------|
| Dasatinib                | P12931         | SRC         | 0.08292133 | Confirmed | 9         |
| Phenethyl Isothiocyanate | P31946         | YWHAB       | 0.06112281 | Confirmed | 10        |
| Adenosine-5'             | P00558         | PGK1        | 0.04545455 | Confirmed | 11        |
| Acetylsalicylic acid     | P54646         | PRKAA2      | 0.03627599 |           |           |
| Glutamic Acid            | P07814         | EPRS        | 0.03527291 | Confirmed | 12        |
| Pyruvic acid             | P14618         | PKM         | 0.03305785 |           |           |
| Trimetazidine            | P09110         | ACAA1       | 0.03061647 | Confirmed | 13        |
| ATP                      | P68400         | CSNK2A1     | 0.03056766 | Confirmed | 14        |
| Dimethyl fumarate        | Q04206         | RELA        | 0.02998375 | Confirmed | 15        |
| Tamoxifen                | P05129         | PRKCG       | 0.02828854 |           |           |

Table S3: The top 10 prioritized repurposed drugs for COPD.

| Drug Name | Target protein | Target gene | Flow value | Status | Reference |
|-----------|----------------|-------------|------------|--------|-----------|
|-----------|----------------|-------------|------------|--------|-----------|

|                                                                          |        |        |            |           |    |
|--------------------------------------------------------------------------|--------|--------|------------|-----------|----|
| Phenethyl<br>Isothiocyanate                                              | P31946 | YWHAB  | 0.05054656 | Confirmed | 16 |
| Minocycline                                                              | P42574 | CASP3  | 0.03767546 | Confirmed | 17 |
| Pseudoephedrine                                                          | P15336 | ATF2   | 0.03201844 | Confirmed | 16 |
| Methyl 4,6-O-[(1R)-1-<br>carboxyethylidene]-beta-<br>D-galactopyranoside | P02743 | APCS   | 0.03150388 |           |    |
| NADH                                                                     | O43920 | NDUFS5 | 0.02409639 | Confirmed | 18 |
| Pyridoxal phosphate                                                      | P00505 | GOT2   | 0.02248822 | Confirmed | 19 |
| Lauric acid                                                              | P41235 | HNF4A  | 0.02246764 | Confirmed | 20 |
| Deferoxamine                                                             | P05067 | APP    | 0.02094241 | Confirmed | 21 |
| Isoprenaline                                                             | P27986 | PIK3R1 | 0.02046899 | Confirmed | 22 |
| Adapalene                                                                | P10276 | RARA   | 0.01800372 |           |    |

It is evident from Table S1, Table S2 and Table S3 that the prediction performance of our proposed framework performance is similar to the performance of the top five prioritized repurposed drugs (Table 2, Table 3 and Table 4 of the main manuscript). In breast cancer, IBD and COPD cases, we have confirmed (validated by literature review) eight, seven and eight drugs, respectively, in the top 10 prioritized repurposed drugs. This performance suggests that further in-vitro validation may confirm the potential clinical usage of our prioritized repurposed drugs.

#### Reference:

- (1) Meurling, L.; Marquez, M.; Nilsson, S.; Holmberg, A. R. Polymer-Conjugated Guanidine Is a Potentially Useful Anti-Tumor Agent. *Int. J. Oncol.* 2009, 35 (2), 281–285. [https://doi.org/10.3892/ijo\\_00000338](https://doi.org/10.3892/ijo_00000338).
- (2) Gupta, P.; Srivastava, S. K. Antitumor Activity of Phenethyl Isothiocyanate in HER2-Positive Breast Cancer Models. *BMC Med.* 2012, 10 (1), 1–8. <https://doi.org/10.1186/1741-7015-10-80>.
- (3) Pantziarka, P.; Sukhtame, V.; Meheus, L.; Sukhatme, V. P. V. V.; Bouche, G.; Meheus, L.; Sukhatme, V. P. V. V.; Bouche, G. Repurposing Non-Cancer Drugs in Oncology — How Many Drugs Are out There? *bioRxiv* 2017. <https://doi.org/10.1101/197434>.
- (4) Tamoxifen. <https://www.webmd.com/drugs/2/drug-4497/tamoxifen-oral/details> (accessed Aug 29, 2021).
- (5) Hofman, J.; Kučera, R.; Cihlova, D.; Klimes, J.; Ceckova, M.; Staud, F. Olomoucine II, but Not Purvalanol A, Is Transported by Breast Cancer Resistance Protein (ABCG2) and P-Glycoprotein (ABCB1). *PLoS One* 2013. <https://doi.org/10.1371/journal.pone.0075520>.
- (6) Chen, L.; Miao, Y.; Liu, M.; Zeng, Y.; Gao, Z.; Peng, D.; Hu, B.; Li, X.; Zheng, Y.; Xue, Y.; Zuo, Z.; Xie, Y.; Ren, J. Pan-Cancer Analysis Reveals the Functional Importance of Protein Lysine Modification in Cancer Development. *Front. Genet.* 2018. <https://doi.org/10.3389/fgene.2018.00254>.
- (7) Therapeutic Target Database <https://db.idrblab.org/ttd/target/t48069> (accessed Jul 27, 2019).
- (8) Himmel, L. E.; Lustberg, M. B.; DeVries, A. C.; Poi, M.; Chen, C. S.; Kulp, S. K. Minocycline, a Putative Neuroprotectant, Co-Administered with Doxorubicin-Cyclophosphamide Chemotherapy in a Xenograft Model of Triple-Negative Breast Cancer. *Exp. Toxicol. Pathol.* 2016. <https://doi.org/10.1016/j.etp.2016.08.001>.
- (9) Can, G.; Ayvaz, S.; Can, H.; Karaboğa, İ.; Demirtaş, S.; Akşit, H.; Yılmaz, B.; Korkmaz, U.; Kurt, M.; Karaca, T. The Efficacy of Tyrosine Kinase Inhibitor Dasatinib on Colonic Mucosal Damage in Murine Model of Colitis. *Clin. Res. Hepatol. Gastroenterol.* 2016, 40 (4), 504–516. <https://doi.org/10.1016/j.clinre.2015.12.006>.
- (10) Dey, M.; Kuhn, P.; Ribnicky, D.; Premkumar, V.; Reuhl, K.; Raskin, I. Dietary Phenethylisothiocyanate Attenuates Bowel Inflammation in Mice. *BMC Chem. Biol.* 2010, 10 (1), 1–2. <https://doi.org/10.1186/1472-6769-10-4>.

- (11) Ye, J. H.; Rajendran, V. M. Adenosine: An Immune Modulator of Inflammatory Bowel Diseases. *World J. Gastroenterol.* 2009, 15 (36), 4491. <https://doi.org/10.3748/wjg.15.4491>.
- (12) Li, T. T.; Zhang, J. F.; Fei, S. J.; Zhu, S. P.; Zhu, J. Z.; Qiao, X.; Liu, Z. B. Glutamate Microinjection into the Hypothalamic Paraventricular Nucleus Attenuates Ulcerative Colitis in Rats. *Acta Pharmacol. Sin.* 2014, 35 (2), 185–194. <https://doi.org/10.1038/aps.2013.140>.
- (13) Kuralay, F.; Yildiz, C.; Ozutemiz, O.; Islekel, H.; Caliskan, S.; Bingol, B.; Ozkal, S. Effects of Trimetazidine on Acetic Acid-Induced Colitis in Female Swiss Rats. *J. Toxicol. Environ. Heal. - Part A* 2003, 66 (2), 169–179. <https://doi.org/10.1080/15287390306402>.
- (14) Wan, P.; Liu, X.; Xiong, Y.; Ren, Y.; Chen, J.; Lu, N.; Guo, Y.; Bai, A. Extracellular ATP Mediates Inflammatory Responses in Colitis via P2 × 7 Receptor Signaling. *Sci. Rep.* 2016, 6 (1), 1–10. <https://doi.org/10.1038/SREP19108>.
- (15) G, C.; M, C.; D, I.; G, B.; I, P.; S, C.; E, E. Dimethyl Fumarate Reduces Inflammatory Responses in Experimental Colitis. *J. Crohns. Colitis* 2016, 10 (4), 472–483. <https://doi.org/10.1093/ECCO-JCC/JJV231>.
- (16) Drugbank. <https://www.drugbank.ca/drugs/DB12695> (accessed Sep 2, 2021).
- (17) Sotomayor, E. A.; Teicher, B. A.; Schwartz, G. N.; Holden, S. A.; Menon, K.; Herman, T. S.; Frei, E. Minocycline in Combination with Chemotherapy or Radiation Therapy in Vitro and in Vivo. *Cancer Chemother. Pharmacol.* 1992, 30, 377–384.
- (18) Li, X.; Yang, H.; Sun, H.; Lu, R.; Zhang, C.; Gao, N.; Meng, Q.; Wu, S.; Wang, S.; Aschner, M.; Wu, J.; Tang, B.; Gu, A.; Kay, S. A.; Chen, R. Taurine Ameliorates Particulate Matter-Induced Emphysema by Switching on Mitochondrial NADH Dehydrogenase Genes. *Proc. Natl. Acad. Sci. U. S. A.* 2017, 114 (45), E9655–E9664. <https://doi.org/10.1073/pnas.1712465114>.
- (19) Canter, P. Herb, Nutrient and Drug Interactions: Clinical Implications and Therapeutic Strategies. *Focus Altern. Complement. Ther.* 2010. <https://doi.org/10.1111/j.2042-7166.2008.tb01840.x>.
- (20) Lauric Acid Supplement: Uses, Benefits, Side Effects, Dose, Precautions & Warnings [https://www.medicinenet.com/lauric\\_acid/supplements-vitamins.htm](https://www.medicinenet.com/lauric_acid/supplements-vitamins.htm) (accessed Oct 11, 2021).
- (21) Chen, Y.; Gao, S.; Yan, Y.; ... J. Q.-A. journal of; 2018, U. Aerosolized Deferoxamine Administration in Mouse Model of Bronchopulmonary Dysplasia Improve Pulmonary Development. *ncbi.nlm.nih.gov* 2018, 10 (1), 325–332.
- (22) Isoprenaline: Uses, Interactions, Mechanism of Action | DrugBank Online <https://go.drugbank.com/drugs/DB01064> (accessed Oct 11, 2021).
